# Supplementary material
Source: publisher site journal article supplement (https://www.dovepress.com/article/450991)
Supplement: Supplementary file 1 [file get_supplementary_file.php]

**Table S1** Demographics and clinical characteristics of enrolled patients

| Characteristics | No. of patients (% of total) | | |
| --- | --- | --- | --- |
| Period 1 (N=200)) | Period 2  (N=259) | Overall  (N=459) |
| Median age (interquartile range) (yr) | 33 (26-58) | 33 (25-51) | 33 (26-55) |
| Female sex | 101 (50.5) | 123 (47.5) | 224 (48.8) |
| Time since onset of symptoms |  |  |  |
| 0-24h | 105 (52.5) | 150 (57.9) | 255 (55.6) |
| 24-48h | 51 (25.5) | 46 (17.8) | 97 (21.1) |
| 48-72h | 19 (9.5) | 30 (11.6) | 49 (10.7) |
| 72+h | 25 (12.5) | 33 (12.7) | 58 (12.6) |
| Symptoms |  |  |  |
| Fever | 196 (98.0) | 240 (92.7) | 436 (95.0) |
| Cough | 97 (48.5) | 157 (60.6) | 254 (55.3) |
| Muscle soreness | 81 (40.5) | 143 (55.2) | 224 (48.8) |
| Weakness | 97 (48.5) | 106 (40.9) | 203 (44.2) |
| Pharyngitis (sore throat) | 81 (40.5) | 101 (39.0) | 182 (39.7) |
| Sputum | 47 (23.5) | 96 (37.1) | 143 (31.2) |
| Headache | 71 (35.5) | 64 (24.7) | 135 (29.4) |
| Chill | 66 (33.0) | 46 (17.8) | 112 (24.4) |
| Dizziness | 58 (29) | 52 (20.1) | 110 (24.0) |
| Rhinorrhea | 55 (27.5) | 50 (19.3) | 105 (22.9) |
| Rhinobyon | 39 (19.5) | 41 (15.8) | 80 (17.4) |
| Nausea | 19 (9.5) | 11 (4.2) | 30 (6.5) |
| Vomiting | 12 (6.0) | 7 (2.7) | 19 (4.1) |
| Chest pain | 7 (3.5) | 1 (0.4) | 8 (1.7) |
| Underlying diseases | 61 (30.5) | 91 (35.1) | 152 (33.1) |

**Table S2** Sensitivities of NPS&OPS and PWG specimens based on demographics and clinical symptoms of enrolled patients

| Characteristics | Patient infected with IAVs | NPS&OPS  positive (Sen.) (%) | PWG  positive (Sen.) (%) |
| --- | --- | --- | --- |
| Age (yr) |  |  |  |
| 14-19 | 25 | 25 (100) | 19 (76.0) |
| 20-39 | 153 | 144 (94.1) | 119 (77.8) |
| 40-59 | 68 | 67 (98.5) | 53 (77.9) |
| 60-87 | 50 | 50 (100) | 46 (92.0) |
| Gender |  |  |  |
| Male | 151 | 145 (96) | **130 (86.1)** |
| Female | 145 | 141 (97.2) | **107 (73.8)** |
| Time since onset of symptoms |  |  |  |
| 0-24h | 165 | 158 (95.8) | 136 (82.4) |
| 24-48h | 72 | 72 (100) | 57 (79.2) |
| 48-72h | 39 | 38 (97.4) | 29 (74.4) |
| 72+h | 20 | 18 (90.0) | 15 (75.0) |
| Symptoms |  |  |  |
| Fever | 287 | 277 (96.5) | 230 (80.1) |
| Cough | 201 | 191 (95.0) | 168 (83.6) |
| Muscle soreness | 160 | 156 (97.5) | 133 (83.1) |
| Weakness | 114 | 111 (97.4) | 88 (77.2) |
| Pharyngitis (sore throat) | 133 | 128 (96.2) | 107 (80.5) |
| Sputum | 112 | 109 (97.3) | 95 (84.8) |
| Headache | 88 | 88 (100) | 67 (76.1) |
| Chill | 73 | 72 (98.6) | 59 (80.8) |
| Dizziness | 68 | 67 (98.5) | 54 (79.4) |
| Rhinorrhea | 85 | 84 (98.8) | 66 (77.6) |
| Rhinobyon | 62 | 61 (98.4) | 53 (85.5) |
| Nausea | 10 | 10 (100) | 7 (70.0) |
| Vomiting | 6 | 6 (100) | 4 (66.7) |
| Chest pain | 6 | 5 (83.3) | 6 (100) |
| Underlying diseases | 80 | 78 (97.5) | 69 (86.3) |

**Notes:** Bold font indicates statistical significance (p=0.008). No significant associations were observed for other characteristics.

**Abbreviations:** IAVs, influenza A virus; NPS&OPS, combined nasopharyngeal and oropharyngeal swab; PWG, purified water gargle; Sen., sensitivity.
